# Supplementary material for: Bridging the size gap between experiment and theory: large-scale DFT calculations on realistic sized Pd particles for acetylene hydrogenation
Source: Royal Society of Chemistry journal article supplement (doi:10.1039/d4ra03369h), 2024-01-01
Supplement: d4ra03369h1.pdf [file d4ra03369h1.pdf]

## SUPPORTING INFORMATION

**Table S1.** Adsorption energies for C<sub>2</sub>H<sub>2</sub>, C<sub>2</sub>H<sub>4</sub>, C<sub>2</sub>H<sub>6</sub> vs C concentration on Pd<sub>55</sub>.

| Pd <sub>55</sub> C <sub>x</sub>             | C <sub>2</sub> H <sub>2</sub> | C <sub>2</sub> H <sub>4</sub> | C <sub>2</sub> H <sub>6</sub> |
|---------------------------------------------|-------------------------------|-------------------------------|-------------------------------|
| <b>[100] Adsorption kJ mol<sup>-1</sup></b> |                               |                               |                               |
| (C = 0)                                     | -300.4                        | -172.9                        | -72.0                         |
| (C = 0.05)                                  | -309.7                        | -151.0                        | -40.3                         |
| (C = 0.13)                                  | -279.9                        | -148.0                        | -37.7                         |
| <b>[111] Adsorption kJ mol<sup>-1</sup></b> |                               |                               |                               |
| (C = 0)                                     | -247.9                        | -148.9                        | -52.1                         |
| (C = 0.05)                                  | -222.1                        | -107.1                        | -29.3                         |
| (C = 0.13)                                  | -176.0                        | -98.1                         | -48.9                         |

**Table S2.** Adsorption energies for C<sub>2</sub>H<sub>2</sub>, C<sub>2</sub>H<sub>4</sub>, C<sub>2</sub>H<sub>6</sub> vs C concentration on Pd<sub>309</sub>.

| Pd <sub>309</sub> C <sub>x</sub>            | C <sub>2</sub> H <sub>2</sub> | C <sub>2</sub> H <sub>4</sub> | C <sub>2</sub> H <sub>6</sub> |
|---------------------------------------------|-------------------------------|-------------------------------|-------------------------------|
| <b>[100] Adsorption kJ mol<sup>-1</sup></b> |                               |                               |                               |
| (C = 0)                                     | -631.1                        | -396.9                        | -291.6                        |
| (C = 0.05)                                  | -350.5                        | -203.9                        | -7.3                          |
| (C = 0.13)                                  | -242.2                        | -137.6                        | -53.7                         |
| <b>[111] Adsorption kJ mol<sup>-1</sup></b> |                               |                               |                               |
| (C = 0)                                     | -534.9                        | -426.8                        | -286.8                        |
| (C = 0.05)                                  | -192.4                        | -147.9                        | -63.0                         |
| (C = 0.13)                                  | -218.9                        | -117.7                        | -100.2                        |

**Table S3.** Reaction energies for the full C<sub>2</sub>H<sub>2</sub> hydrogenation mechanism to C<sub>2</sub>H<sub>4</sub> and C<sub>2</sub>H<sub>6</sub> on cuboctahedral Pd<sub>55</sub>C<sub>x</sub>.

| <b>[100] – Reaction energies kJ mol<sup>-1</sup></b> |        |        |        |        |
|------------------------------------------------------|--------|--------|--------|--------|
| PdC <sub>x</sub>                                     | Part A | Part B | Part C | Part D |
| (C = 0)                                              | -57.6  | -88.1  | 9.9    | -1.2   |
| (C = 0.05)                                           | -58.27 | -95.7  | 6.5    | 16.7   |
| (C = 0.13)                                           | -57.35 | -81.1  | 23.9   | 4.4    |
| <b>[111] – Reaction energies kJ mol<sup>-1</sup></b> |        |        |        |        |
| PdC <sub>x</sub>                                     | Part A | Part B | Part C | Part D |
| (C = 0)                                              | 91.5   | -143.0 | -4.1   | -17.5  |
| (C = 0.05)                                           | 7.1    | -3.4   | 14.6   | -20.6  |
| (C = 0.13)                                           | -8.4   | -64.9  | -7.9   | -20.2  |

**Table S4.** Reaction energies for the full C<sub>2</sub>H<sub>2</sub> hydrogenation mechanism to C<sub>2</sub>H<sub>4</sub> and C<sub>2</sub>H<sub>6</sub> on cuboctahedral Pd<sub>309</sub>C<sub>x</sub>.

| <b>[100] – Reaction energies kJ mol<sup>-1</sup></b> |        |        |        |        |
|------------------------------------------------------|--------|--------|--------|--------|
| PdC <sub>x</sub>                                     | Part A | Part B | Part C | Part D |
| (C = 0)                                              | -28.6  | -149.3 | 34.8   | -10.5  |
| (C = 0.05)                                           | -116.8 | -30.7  | 49.9   | 78.6   |
| (C = 0.13)                                           | -76.3  | -99.9  | -41.7  | 68.5   |
| <b>[111] – Reaction energies kJ mol<sup>-1</sup></b> |        |        |        |        |
| PdC <sub>x</sub>                                     | Part A | Part B | Part C | Part D |
| (C = 0)                                              | 35.9   | -31.3  | -22.5  | 87.5   |
| (C = 0.05)                                           | -16.5  | -17.7  | 46.7   | -13.5  |
| (C = 0.13)                                           | 23.5   | -89.7  | 38.8   | -75.9  |

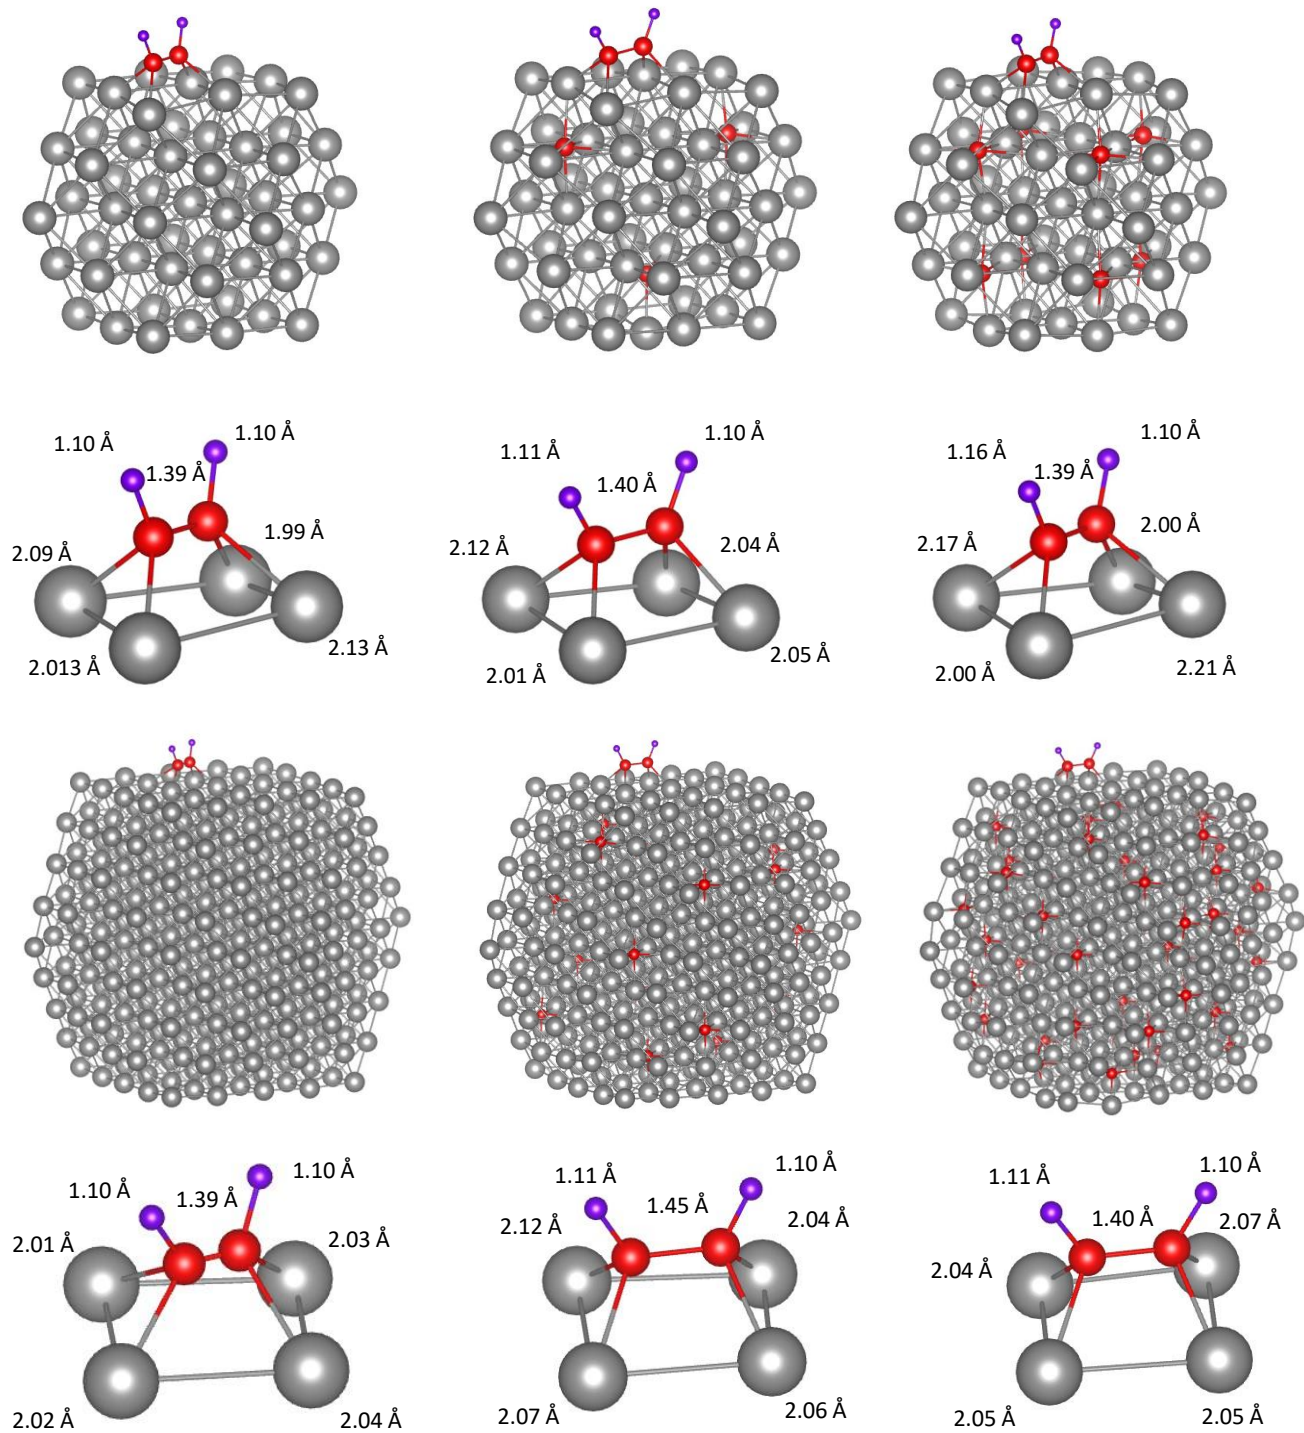

**Figure S1.** Acetylene bonding (Pd-C and C-H) on the [100] facet of the pristine and carbidic Pd<sub>55</sub> and Pd<sub>309</sub> nanoparticles.

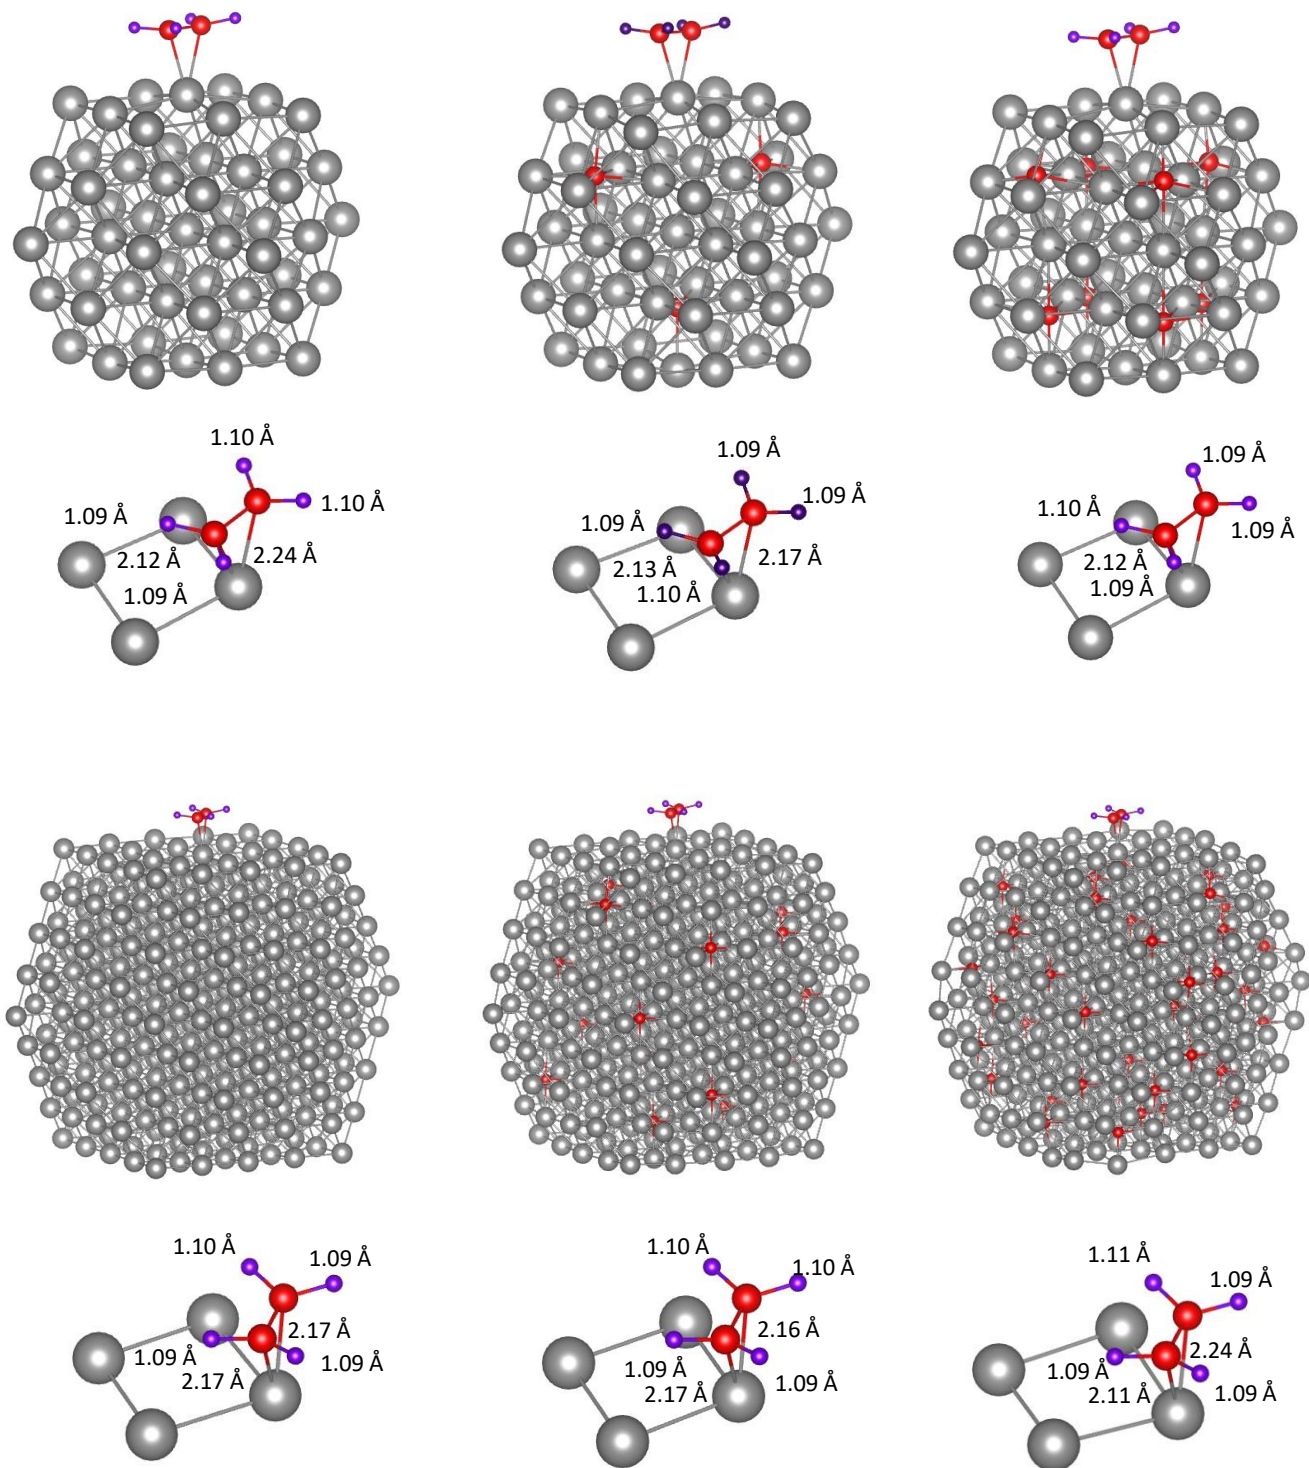

**Figure S2.** Ethylene bonding (Pd-C and C-H) on the [100] facet of the pristine and carbidic Pd<sub>55</sub> and Pd<sub>309</sub> nanoparticles.

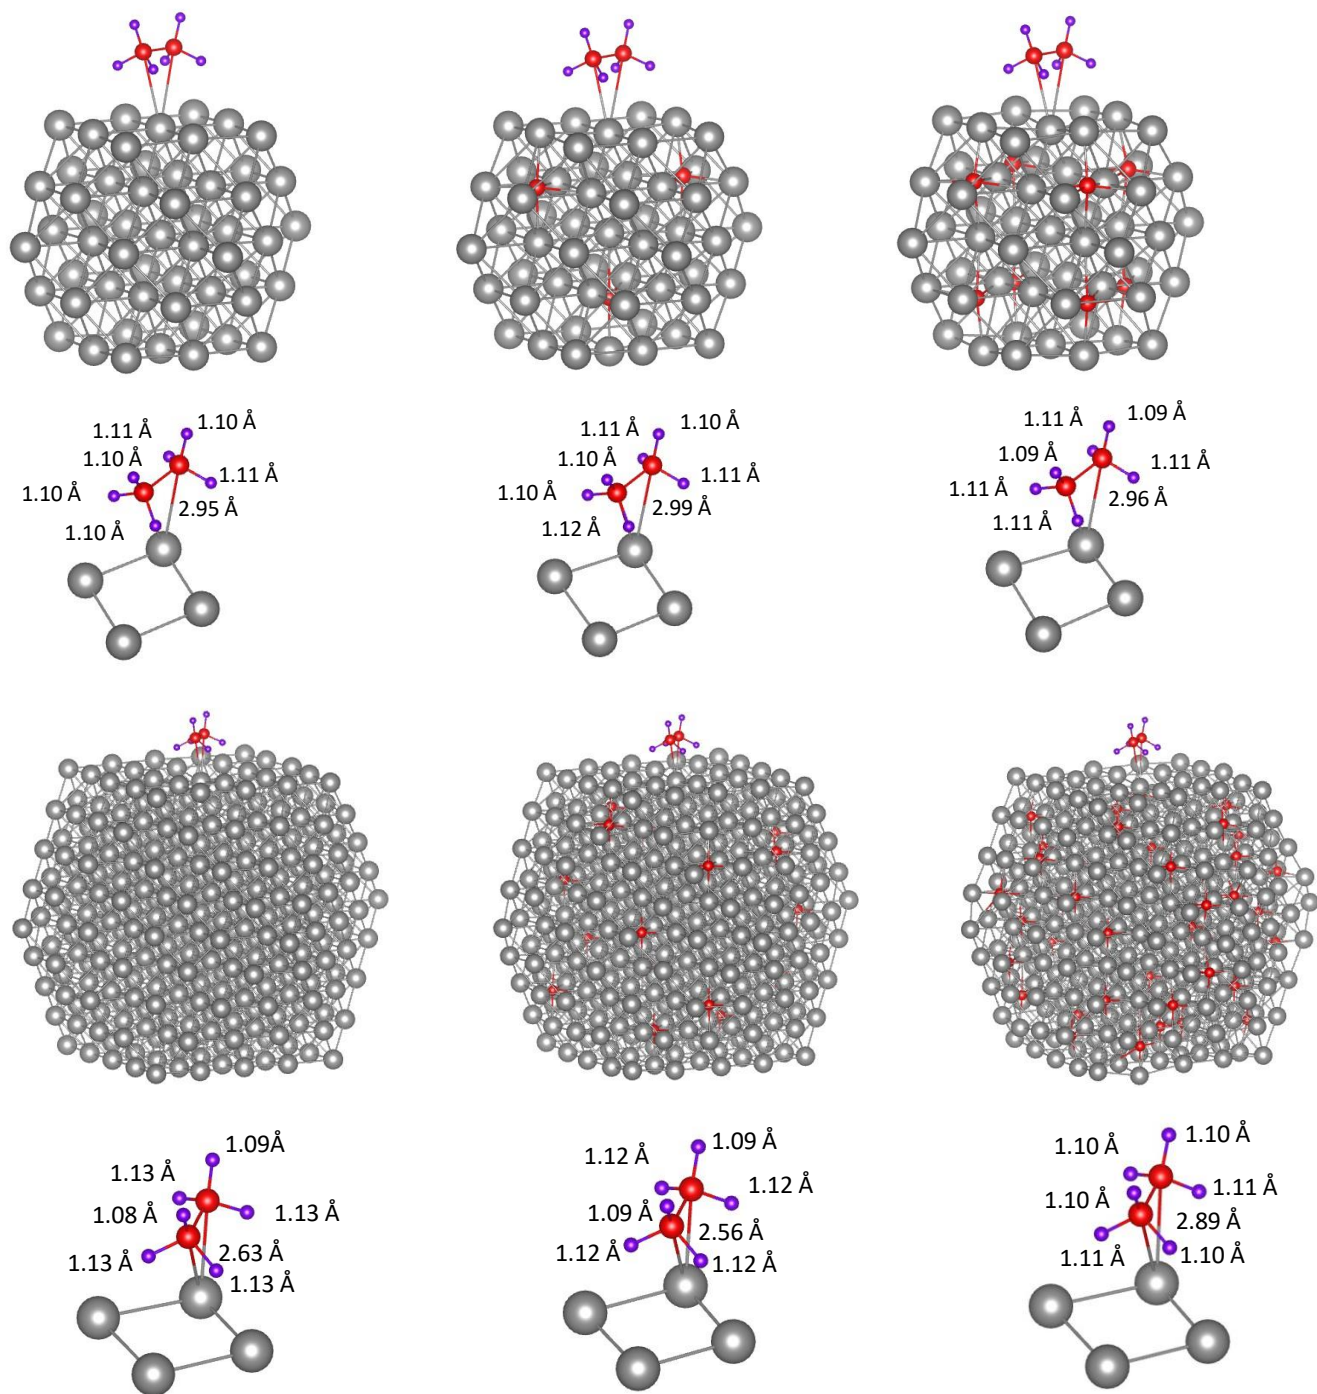

**Figure S3.** Ethane bonding (Pd-C and C-H) on the [100] facet of the pristine and carbidic Pd<sub>55</sub> and Pd<sub>309</sub> nanoparticles.

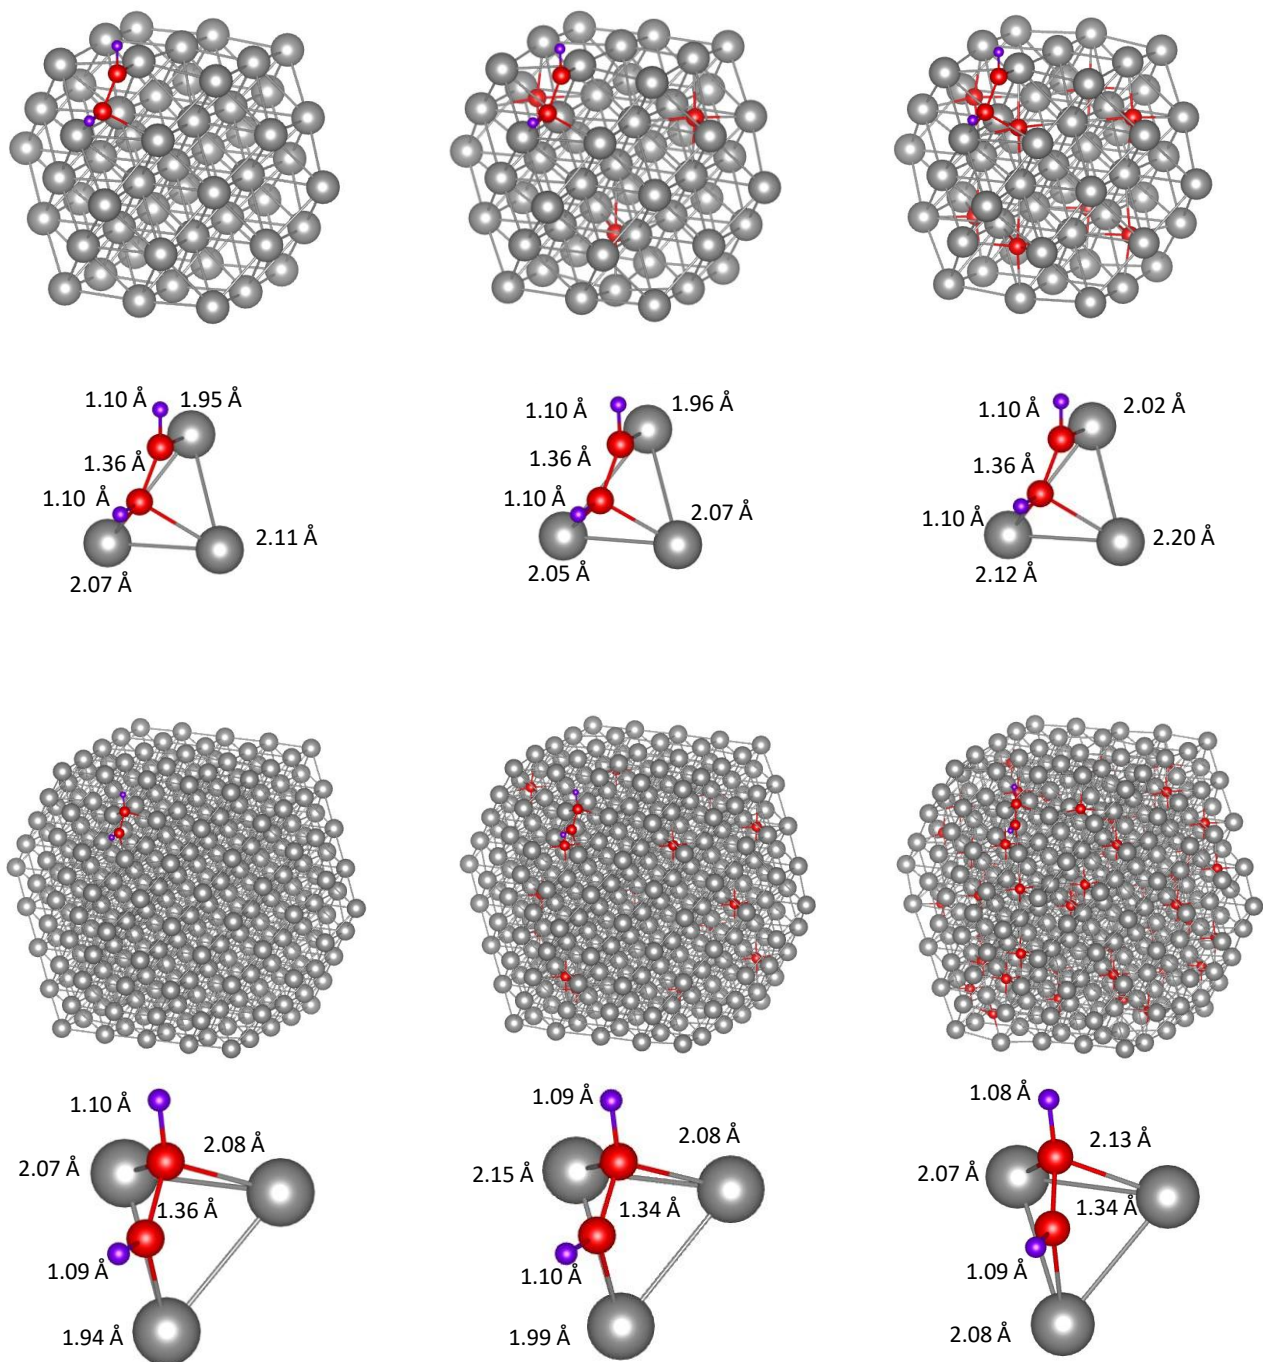

**Figure S4.** Acetylene bonding (Pd-C and C-H) on the [111] facet of the pristine and carbidic Pd<sub>55</sub> and Pd<sub>309</sub> nanoparticles.

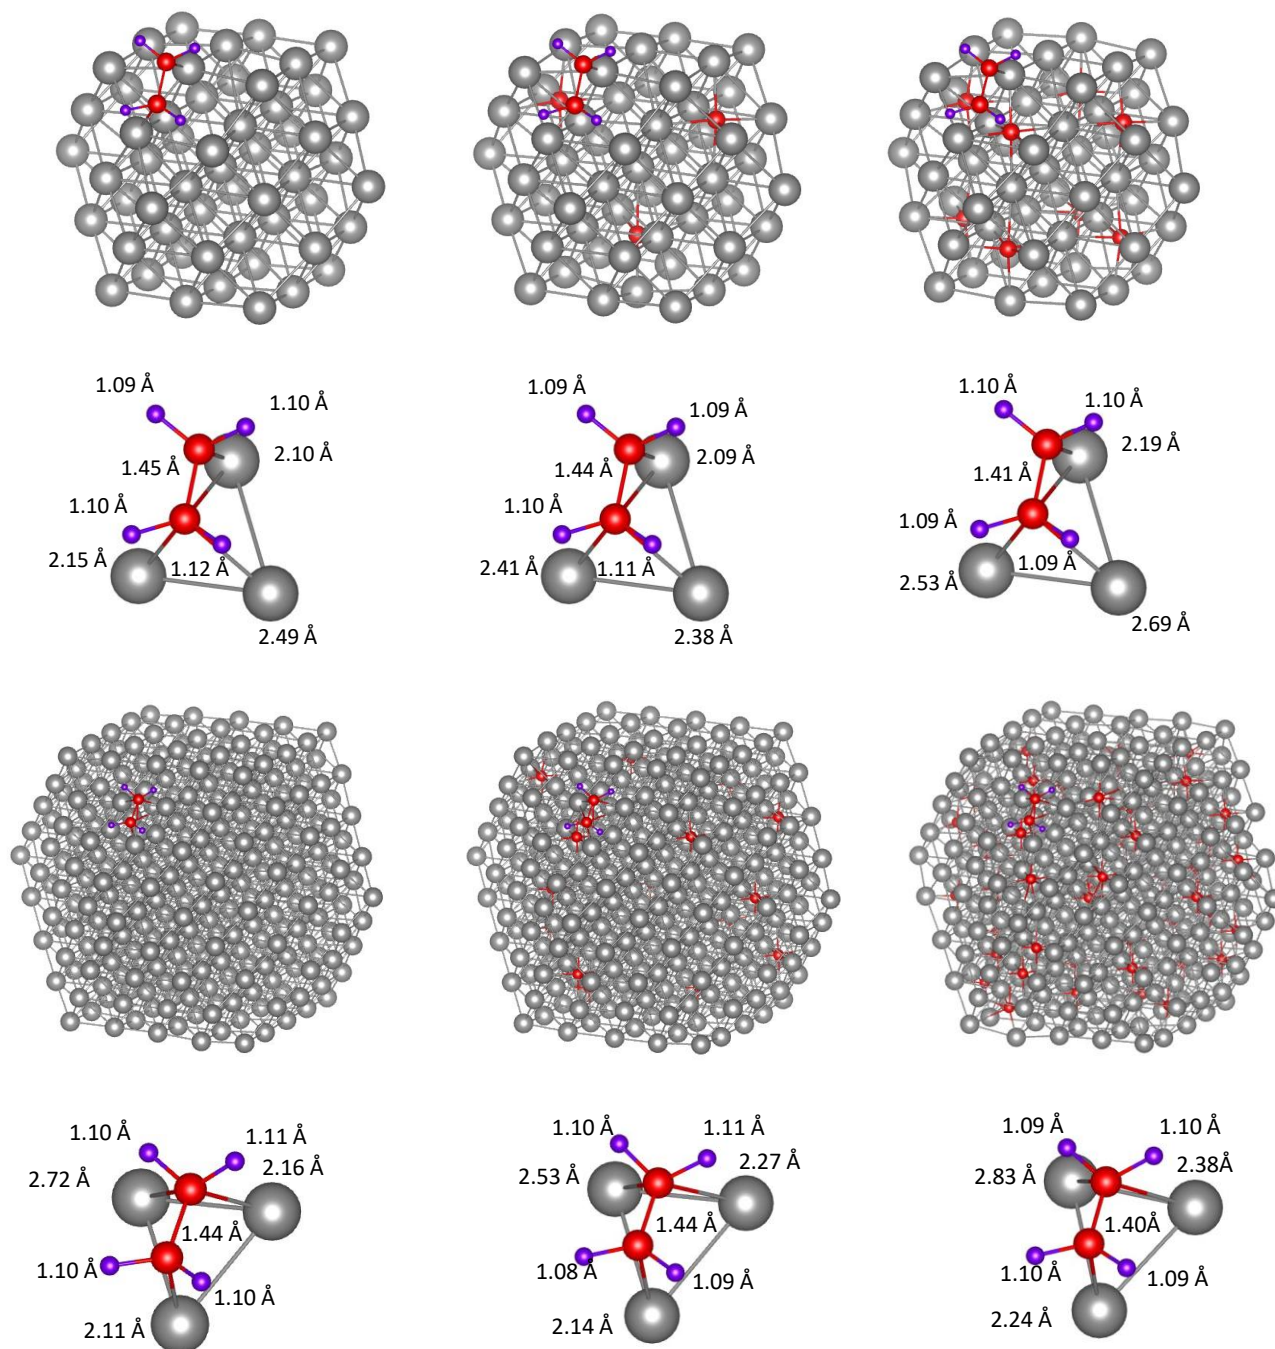

**Figure S5.** Ethylene bonding (Pd-C and C-H) on the [111] facet of the pristine and carbidic Pd<sub>55</sub> and Pd<sub>309</sub> nanoparticles.

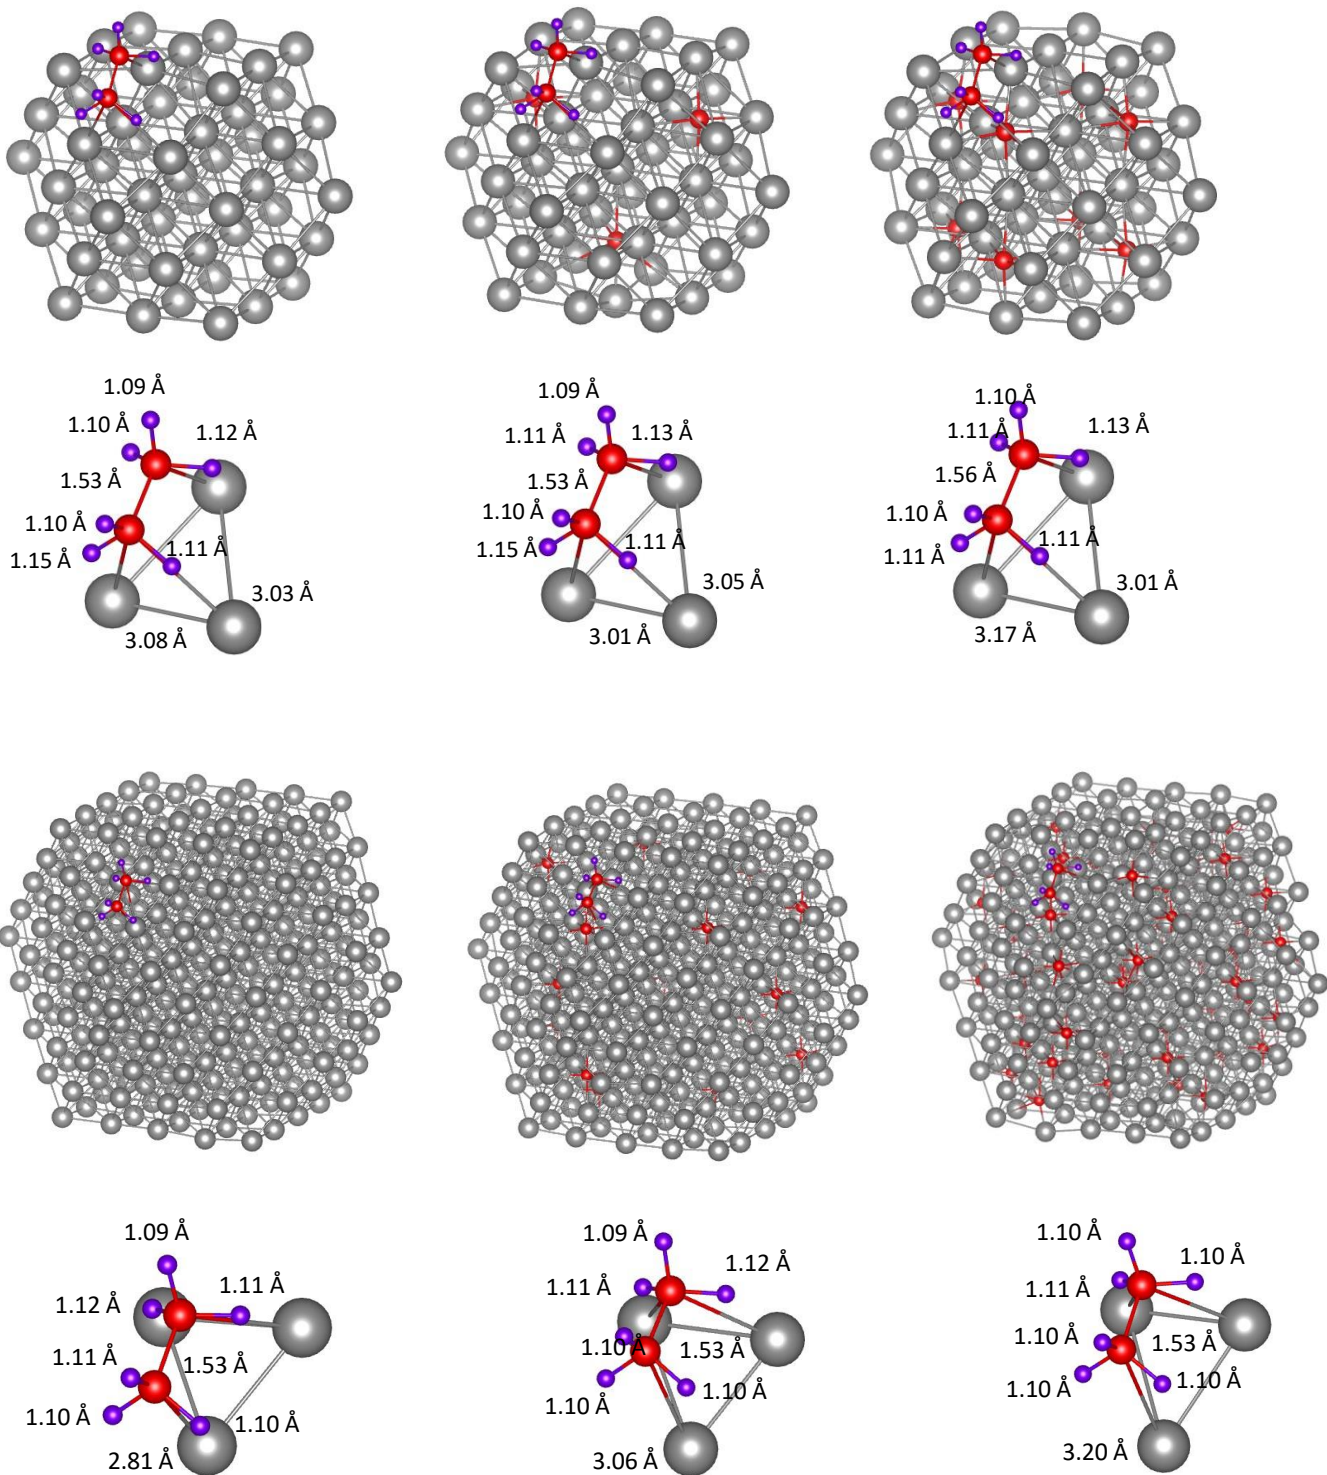

**Figure S6.** Ethane bonding (Pd-C and C-H) on the [111] facet of the pristine and carbidic Pd<sub>55</sub> and Pd<sub>309</sub> nanoparticles.
